# Supplementary material for: Cryo-EM structures of the pore-forming A subunit from the Yersinia entomophaga ABC toxin
Source: PubMed Central journal article supplement (PMC6486591; doi:10.1038/s41467-019-09890-8), 2019-04-26
Supplement: 41467_2019_9890_MOESM3_ESM.pdf [file 41467_2019_9890_MOESM3_ESM.pdf]

## **Description of Additional Supplementary Files**

File Name: Supplementary Data 1

Description: List of the 423 unique glycans, grouped in 15 distinct classes, printed on the array for each screen.

File Name: Supplementary Movie 1

Description: Visualisation of structural transitions between the pre-pore and pore configuration of YenTcA.
