# Supplementary material for: Cryo-EM structures of the pore-forming A subunit from the Yersinia entomophaga ABC toxin
Source: PubMed Central journal article supplement (PMC6486591; doi:10.1038/s41467-019-09890-8), 2019-04-26
Supplement: 41467_2019_9890_MOESM4_ESM.pdf [file 41467_2019_9890_MOESM4_ESM.pdf]

**Supplementary Data 1.** List of the 423 unique glycans, grouped in 15 distinct classes, printed on the array for each screen. For each glycan, the library ID, full name and molecular weight are shown.

| <b>ID</b>              | <b>Name</b>                                                           | <b>MW<br/>(g/mol)</b> |
|------------------------|-----------------------------------------------------------------------|-----------------------|
| <b>Monosaccharides</b> |                                                                       |                       |
| 1                      | Fuc $\alpha$ -sp3                                                     | 221.3                 |
| 3                      | Gal $\beta$ -sp3                                                      | 237.3                 |
| 4                      | GalNAc $\alpha$ -sp0                                                  | 308.3                 |
| 5                      | GalNAc $\alpha$ -sp3                                                  | 278.3                 |
| 6                      | GalNAc $\beta$ -sp3                                                   | 278.3                 |
| 7                      | Glc $\alpha$ -sp3                                                     | 237.3                 |
| 9                      | Glc $\beta$ -sp3                                                      | 237.3                 |
| 10                     | GlcNAc $\beta$ -sp3                                                   | 278.3                 |
| 14                     | GlcN(Gc) $\beta$ -sp4                                                 | 293.3                 |
| 15                     | HOCH <sub>2</sub> (HOCH) <sub>4</sub> CH <sub>2</sub> NH <sub>2</sub> | 181.2                 |
| 19                     | ManNAc $\beta$ -sp4                                                   | 277.3                 |
| 20                     | Rha $\alpha$ -sp3                                                     | 221.3                 |
| 22                     | GlcNAc $\beta$ -sp4                                                   | 277.3                 |
| 37                     | 3-O-Su-Gal $\beta$ -sp3                                               | 317.3                 |
| 38                     | 3-O-Su-GalNAc $\alpha$ -sp3                                           | 358.4                 |
| 43                     | 6-O-Su-GlcNAc $\beta$ -sp3                                            | 358.4                 |
| 44                     | GlcA $\alpha$ -sp3                                                    | 251.2                 |
| 45                     | GlcA $\beta$ -sp3                                                     | 251.2                 |
| 46                     | 6-H <sub>2</sub> PO <sub>3</sub> Glc $\beta$ -sp4                     | 316.2                 |
| 47                     | 6-H <sub>2</sub> PO <sub>3</sub> Man $\alpha$ -sp3                    | 339.2                 |
| 48                     | Neu5Ac $\alpha$ -sp3                                                  | 366.4                 |
| 49                     | Neu5Ac $\alpha$ -sp9                                                  | 471.5                 |
| 52                     | Neu5Gc $\alpha$ -sp3                                                  | 382.4                 |
| 54                     | 9-Nac-Neu5Ac $\alpha$ -sp3                                            | 407.4                 |
| 55                     | 3-O-Su-GlcNAc $\beta$ -sp3                                            | 358.4                 |
| <b>Disaccharides</b>   |                                                                       |                       |
| 71                     | Fuc $\alpha$ 1-2Gal $\beta$ -sp3                                      | 383.4                 |
| 72                     | Fuc $\alpha$ 1-3GlcNAc $\beta$ -sp3                                   | 424.5                 |
| 73                     | Fuc $\alpha$ 1-4GlcNAc $\beta$ -sp3                                   | 424.5                 |
| 75                     | Gal $\alpha$ 1-2Gal $\beta$ -sp3                                      | 399.4                 |
| 77                     | Gal $\alpha$ 1-3GalNAc $\beta$ -sp3                                   | 440.5                 |
| 78                     | Gal $\alpha$ 1-3GalNAc $\alpha$ -sp3                                  | 440.5                 |
| 80                     | Gal $\alpha$ 1-3GlcNAc $\beta$ -sp3                                   | 440.5                 |
| 81                     | Gal $\alpha$ 1-4GlcNAc $\beta$ -sp3                                   | 440.5                 |
| 83                     | Gal $\alpha$ 1-6Glc $\beta$ -sp4                                      | 398.4                 |
| 84                     | Gal $\beta$ 1-2Gal $\beta$ -sp3                                       | 399.4                 |
| 85                     | Gal $\beta$ 1-3GlcNAc $\beta$ -sp3                                    | 440.5                 |
| 87                     | Gal $\beta$ 1-3Gal $\beta$ -sp3                                       | 399.4                 |
| 88                     | Gal $\beta$ 1-3GalNAc $\beta$ -sp3                                    | 440.5                 |
| 89                     | Gal $\beta$ 1-3GalNAc $\alpha$ -sp3                                   | 440.5                 |
| 93                     | Gal $\beta$ 1-4Glc $\beta$ -sp4                                       | 398.4                 |
| 94                     | Gal $\beta$ 1-4Gal $\beta$ -sp4                                       | 398.4                 |
| 97                     | Gal $\beta$ 1-4GlcNAc $\beta$ -sp3                                    | 440.5                 |
| 100                    | Gal $\beta$ 1-6Gal $\beta$ -sp4                                       | 398.4                 |

|     |                                                                                       |       |
|-----|---------------------------------------------------------------------------------------|-------|
| 101 | GalNAc $\alpha$ 1-3GalNAc $\beta$ -sp3                                                | 481.5 |
| 103 | GalNAc $\alpha$ 1-3GalNAc $\alpha$ -sp3                                               | 481.5 |
| 104 | GalNAc $\beta$ 1-3Gal $\beta$ -sp3                                                    | 440.5 |
| 106 | GalNAc $\beta$ 1-4GlcNAc $\beta$ -sp3                                                 | 481.5 |
| 110 | Glc $\alpha$ 1-4Glc $\beta$ -sp3                                                      | 399.4 |
| 111 | Glc $\beta$ 1-4Glc $\beta$ -sp4                                                       | 398.4 |
| 112 | Glc $\beta$ 1-6Glc $\beta$ -sp4                                                       | 398.4 |
| 113 | GlcNAc $\beta$ 1-3GalNAc $\alpha$ -sp3                                                | 481.5 |
| 114 | GlcNAc $\beta$ 1-3Man $\beta$ -sp4                                                    | 439.4 |
| 115 | GlcNAc $\beta$ 1-4GlcNAc $\beta$ -Asn                                                 | 538.5 |
| 117 | GlcNAc $\beta$ 1-4GlcNAc $\beta$ -sp4                                                 | 480.5 |
| 118 | GlcNAc $\beta$ 1-6GalNAc $\alpha$ -sp3                                                | 481.5 |
| 119 | Man $\alpha$ 1-2Man $\beta$ -sp4                                                      | 398.4 |
| 120 | Man $\alpha$ 1-3Man $\beta$ -sp4                                                      | 398.4 |
| 121 | Man $\alpha$ 1-4Man $\beta$ -sp4                                                      | 398.4 |
| 122 | Man $\alpha$ 1-6Man $\beta$ -sp4                                                      | 398.4 |
| 123 | Man $\beta$ 1-4GlcNAc $\beta$ -sp4                                                    | 439.4 |
| 124 | Man $\alpha$ 1-2Man $\alpha$ -sp4                                                     | 398.4 |
| 145 | Gal $\beta$ 1-3(6-O-Su)GlcNAc $\beta$ -sp3                                            | 520.5 |
| 146 | Gal $\beta$ 1-4(6-O-Su)Glc $\beta$ -sp2                                               | 465.5 |
| 147 | Gal $\beta$ 1-4(6-O-Su)GlcNAc $\beta$ -sp3                                            | 520.5 |
| 149 | GlcNAc $\beta$ 1-4(6-O-Su)GlcNAc $\beta$ -sp2                                         | 547.5 |
| 150 | 3-O-Su-Gal $\beta$ 1-3GalNAc $\alpha$ -sp3                                            | 520.5 |
| 151 | 6-O-Su-Gal $\beta$ 1-3GalNAc $\alpha$ -sp3                                            | 520.5 |
| 152 | 3-O-Su-Gal $\beta$ 1-4Glc $\beta$ -sp2                                                | 465.3 |
| 153 | 6-O-Su-Gal $\beta$ 1-4Glc $\beta$ -sp2                                                | 465.3 |
| 155 | 3-O-Su-Gal $\beta$ 1-3GlcNAc $\beta$ -sp3                                             | 520.5 |
| 157 | 3-O-Su-Gal $\beta$ 1-4GlcNAc $\beta$ -sp3                                             | 520.5 |
| 159 | 4-O-Su-Gal $\beta$ 1-4GlcNAc $\beta$ -sp3                                             | 520.5 |
| 161 | 6-O-Su-Gal $\beta$ 1-3GlcNAc $\beta$ -sp3                                             | 520.5 |
| 163 | 6-O-Su-Gal $\beta$ 1-4GlcNAc $\beta$ -sp3                                             | 520.5 |
| 164 | GlcA $\beta$ 1-3GlcNAc $\beta$ -sp3                                                   | 454.4 |
| 165 | GlcA $\beta$ 1-3Gal $\beta$ -sp3                                                      | 413.4 |
| 166 | GlcA $\beta$ 1-6Gal $\beta$ -sp3                                                      | 413.4 |
| 167 | GlcNAc $\beta$ 1-4-[HOOC(CH <sub>3</sub> )CH]-3-O-GlcNAc $\beta$ -sp4                 | 522.5 |
| 168 | GlcNAc $\beta$ 1-4-[HOOC(CH <sub>3</sub> )CH]-3-O-GlcNAc $\beta$ -L-Ala-D-i-Gln-L-Lys | 823.9 |
| 169 | Neu5Ac $\alpha$ 2-3Gal $\beta$ -sp3                                                   | 528.5 |
| 170 | Neu5Ac $\alpha$ 2-6Gal $\beta$ -sp3                                                   | 528.5 |
| 171 | Neu5Ac $\alpha$ 2-3GalNAc $\alpha$ -sp3                                               | 569.6 |
| 172 | Neu5Ac $\alpha$ 2-6GalNAc $\alpha$ -sp3                                               | 569.6 |
| 174 | Neu5Gc $\alpha$ 2-6GalNAc $\alpha$ -sp3                                               | 585.6 |
| 176 | 3-O-Su-Gal $\beta$ 1-4(6-O-Su)Glc $\beta$ -sp2                                        | 567.5 |
| 177 | 3-O-Su-Gal $\beta$ 1-4(6-O-Su)GlcNAc $\beta$ -sp2                                     | 622.6 |
| 178 | 6-O-Su-Gal $\beta$ 1-4(6-O-Su)Glc $\beta$ -sp2                                        | 567.5 |
| 179 | 6-O-Su-Gal $\beta$ 1-3(6-O-Su)GlcNAc $\beta$ -sp2                                     | 608.5 |
| 180 | 6-O-Su-Gal $\beta$ 1-4(6-O-Su)GlcNAc $\beta$ -sp2                                     | 608.5 |
| 181 | 3,4-O-Su <sub>2</sub> -Gal $\beta$ 1-4GlcNAc $\beta$ -sp3                             | 622.6 |
| 182 | 3,6-O-Su <sub>2</sub> -Gal $\beta$ 1-4GlcNAc $\beta$ -sp2                             | 608.5 |
| 183 | 4,6-O-Su <sub>2</sub> -Gal $\beta$ 1-4GlcNAc $\beta$ -sp2                             | 608.5 |

|                       |                                          |       |
|-----------------------|------------------------------------------|-------|
| 184                   | 4,6-O-Su2-Galβ1-4GlcNAcβ-sp3             | 622.6 |
| 186                   | Neu5Acα2-8Neu5Acα2-sp3                   | 679.6 |
| 189                   | 3,6-O-Su2-Galβ1-4(6-O-Su)GlcNAcβ-sp2     | 710.6 |
| 192                   | GalNAcβ1-4(6-O-Su)GlcNAcβ-sp3            | 561.5 |
| 193                   | 3-O-Su-GalNAcβ1-4GlcNAcβ-sp3             | 561.5 |
| 194                   | 6-O-Su-GalNAcβ1-4GlcNAcβ-sp3             | 561.5 |
| 195                   | 6-O-Su-GalNAcβ1-4-(3-O-Su)GlcNAcβ-sp3    | 603.5 |
| 196                   | 3-O-Su-GalNAcβ1-4(3-O-Su)-GlcNAcβ-sp3    | 663.5 |
| 197                   | 3,6-O-Su2-GalNAcβ1-4GlcNAcβ-sp3          | 663.5 |
| 198                   | 4,6-O-Su2-GalNAcβ1-4GlcNAcβ-sp3          | 663.5 |
| 199                   | 4,6-O-Su2-GalNAcβ1-4-(3-O-Ac)GlcNAcβ-sp3 | 705.5 |
| 200                   | 4-O-Su-GalNAcβ1-4GlcNAcβ-sp3             | 561.5 |
| 201                   | 3,4-O-Su2-Galβ1-4GlcNAcβ-sp3             | 663.5 |
| 202                   | 6-O-Su-GalNAcβ1-4(6-O-Su)GlcNAcβ-sp3     | 663.5 |
| 203                   | Galβ1-4(6-O-Su)GlcNAcβ-sp2               | 506.5 |
| 204                   | 4-O-Su-GalNAcβ1-4GlcNAcβ-sp2             | 547.5 |
| 205                   | Neu5Acα2-6GalNAcβ-sp3                    | 569.6 |
| 206                   | Neu5Gcα2-3Gal-sp3                        | 544.5 |
| <b>Trisaccharides</b> |                                          |       |
| 215                   | Fuca1-2Galβ1-3GlcNAcβ-sp3                | 586.6 |
| 216                   | Fuca1-2Galβ1-4GlcNAcβ-sp3                | 586.6 |
| 217                   | Fuca1-2Galβ1-3GalNAcα-sp3                | 586.6 |
| 219                   | Fuca1-2Galβ1-4Glcβ-sp4                   | 544.5 |
| 220                   | Galα1-3Galβ1-4Glcβ-sp2                   | 547.5 |
| 222                   | Galα1-3Galβ1-4GlcNAcβ-sp3                | 602.6 |
| 224                   | Galα1-4Galβ1-4Glcβ-sp3                   | 561.5 |
| 225                   | Galα1-4Galβ1-4GlcNAc-sp2                 | 588.6 |
| 226                   | Fuca1-2(Galα1-3)Galβ-sp3                 | 545.5 |
| 228                   | Galβ1-2Galα1-4GlcNAcβ-sp4                | 601.6 |
| 229                   | Galβ1-3Galβ1-4GlcNAcβ-sp4                | 601.6 |
| 231                   | Galβ1-4GlcNAcβ1-3GalNAcα-sp3             | 643.6 |
| 232                   | Galβ1-4GlcNAcβ1-6GalNAcα-sp3             | 643.6 |
| 233                   | Galβ1-3(Fuca1-4)GlcNAcβ-sp3              | 586.6 |
| 234                   | Fuca1-3(Galβ1-4)GlcNAcβ-sp3              | 586.6 |
| 235                   | Fuca1-2(GalNAcα1-3)Galβ-sp3              | 586.6 |
| 238                   | GalNAcβ1-4Galβ1-4Glcβ-sp3                | 602.6 |
| 240                   | (Glcα1-4) <sub>3</sub> β-sp4             | 560.5 |
| 241                   | (Glcα1-6) <sub>3</sub> β-sp4             | 560.5 |
| 246                   | GlcNAcβ1-2Galβ1-3GalNAcα-sp3             | 643.6 |
| 247                   | GlcNAcβ1-3Galβ1-3GalNAcα-sp3             | 643.6 |
| 248                   | GlcNAcβ1-3Galβ1-4Glcβ-sp2                | 588.6 |
| 250                   | GlcNAcβ1-3Galβ1-4GlcNAcβ-sp3             | 643.6 |
| 251                   | GlcNAcβ1-4Galβ1-4GlcNAcβ-sp2             | 629.6 |
| 252                   | GlcNAcβ1-4GlcNAcβ1-4GlcNAcβ-sp4          | 683.6 |
| 253                   | GlcNAcβ1-6Galβ1-4GlcNAcβ-sp2             | 629.6 |
| 254                   | Galβ1-3(GlcNAcβ1-6)GalNAcα-sp3           | 643.6 |
| 255                   | GlcNAcβ1-3(GlcNAcβ1-6)GalNAcα-sp3        | 684.7 |
| 258                   | Manα1-3(Manα1-6)Manβ-sp4                 | 560.5 |
| 262                   | Galβ1-3GalNAcβ1-3Gal-sp4                 | 601.6 |

|                         |                                       |       |
|-------------------------|---------------------------------------|-------|
| 264                     | Galβ1-4Galβ1-4GlcNAc-sp3              | 602.6 |
| 287                     | 3-O-Su-Galβ1-3(Fuca1-4)GlcNAcβ-sp3    | 666.7 |
| 288                     | Fuca1-3(3-O-Su-Galβ1-4)GlcNAcβ-sp3    | 666.7 |
| 289                     | Galα1-3(Neu5Acα2-6)GalNAcα-sp3        | 731.7 |
| 290                     | Galβ1-3(Neu5Acα2-6)GalNAcα-sp3        | 731.7 |
| 292                     | Neu5Acα2-3Galβ1-3GalNAcα-sp3          | 731.7 |
| 293                     | Neu5Acα2-3Galβ1-4Glcβ-sp3             | 690.7 |
| 294                     | Neu5Acα2-3Galβ1-4Glcβ-sp4             | 689.6 |
| 295                     | Neu5Acα2-6Galβ1-4Glcβ-sp2             | 676.6 |
| 298                     | Neu5Acα2-3Galβ1-4GlcNAcβ-sp3          | 731.7 |
| 299                     | Neu5Acα2-3Galβ1-3GlcNAcβ-sp3          | 731.7 |
| 300                     | Neu5Acα2-6Galβ1-4GlcNAcβ-sp3          | 731.7 |
| 303                     | Neu5Gcα2-3Galβ1-4GlcNAcβ-sp3          | 747.7 |
| 304                     | Neu5Gcα2-6Galβ1-4GlcNAcβ-sp3          | 747.7 |
| 306                     | 9-Nac-Neu5Acα2-6Galβ1-4GlcNAcβ-sp3    | 788.8 |
| 315                     | Neu5Acα2-3Galβ1-4-(6-O-Su)GlcNAcβ-sp3 | 833.8 |
| 317                     | Neu5Acα2-3Galβ1-3-(6-O-Su)GalNAcβ-sp3 | 833.8 |
| 318                     | Neu5Acα2-6Galβ1-4-(6-O-Su)GlcNAcβ-sp3 | 833.8 |
| 319                     | Neu5Acα2-3-(6-O-Su)Galβ1-4GlcNAcβ-sp3 | 833.8 |
| 321                     | (Neu5Acα2-8) <sub>3</sub> -sp3        | 992.9 |
| 323                     | Neu5Acα2-6Galβ1-3GlcNAc-sp3           | 731.7 |
| 324                     | Neu5Acα2-6Galβ1-3(6-O-Su)GlcNAc-sp3   | 883.8 |
| 331                     | Neu5Gcα2-3Galβ1-3GlcNAcβ-sp3          | 747.7 |
| <b>Tetrasaccharides</b> |                                       |       |
| 359                     | Fuca1-2(Galα1-3)Galβ1-3GlcNAcβ-sp3    | 748.7 |
| 360                     | Fuca1-2(Galα1-3)Galβ1-4GlcNAcβ-sp3    | 748.7 |
| 362                     | Fuca1-2(Galα1-3)Galβ1-3GalNAcα-sp3    | 748.7 |
| 363                     | Fuca1-2(Galα1-3)Galβ1-3GalNAcβ-sp3    | 748.7 |
| 364                     | Fuca1-3(Galα1-3Galβ1-4)GlcNAcβ-sp3    | 748.7 |
| 366                     | Fuca1-2(GalNAcα1-3)Galβ1-3GlcNAcβ-sp3 | 789.8 |
| 368                     | Fuca1-2(GalNAcα1-3)Galβ1-4GlcNAcβ-sp3 | 789.8 |
| 371                     | Fuca1-2Galβ1-3(Fuca1-4)GlcNAcβ-sp3    | 732.7 |
| 372                     | Fuca1-3(Fuca1-2Galβ1-4)GlcNAcβ-sp3    | 732.7 |
| 373                     | Galα1-3Galβ1-4GlcNAcβ1-3Galβ-sp3      | 764.7 |
| 375                     | Galα1-4GlcNAcβ1-3Galβ1-4GlcNAcβ-sp3   | 805.8 |
| 376                     | Galβ1-3GlcNAcβ1-3Galβ1-4Glcβ-sp4      | 763.7 |
| 377                     | Galβ1-3GlcNAcβ1-3Galβ1-3GlcNAcβ-sp2   | 791.8 |
| 378                     | Galβ1-3GlcNAcα1-3Galβ1-4GlcNAcβ-sp3   | 805.8 |
| 379                     | Galβ1-3GlcNAcβ1-3Galβ1-4GlcNAcβ-sp3   | 805.8 |
| 380                     | Galβ1-3GlcNAcα1-6Galβ1-4GlcNAcβ-sp2   | 791.8 |
| 381                     | Galβ1-3GlcNAcβ1-6Galβ1-4GlcNAcβ-sp2   | 791.8 |
| 382                     | Galβ1-3GalNAcβ1-4Galβ1-4Glcβ-sp3      | 764.7 |
| 383                     | Galβ1-4GlcNAcβ1-3Galβ1-4Glcβ-sp2      | 763.7 |
| 385                     | Galβ1-4GlcNAcβ1-3Galβ1-4GlcNAcβ-sp3   | 805.8 |
| 387                     | Galβ1-4GlcNAcβ1-6Galβ1-4GlcNAcβ-sp2   | 791.7 |
| 388                     | Galβ1-3(Galβ1-4GlcNAcβ1-6)GalNAcα-sp3 | 805.8 |
| 389                     | GalNAcβ1-3Galα1-4Galβ1-4Glcβ-sp3      | 764.7 |
| 390                     | (Glcα1-4) <sub>4</sub> β-sp4          | 722.7 |

|                              |                                                                                               |        |
|------------------------------|-----------------------------------------------------------------------------------------------|--------|
| 391                          | (Glc $\alpha$ 1-6) $_4\beta$ -sp4                                                             | 722.7  |
| 392                          | Fuca1-2(GalNAc $\alpha$ 1-3)Gal $\beta$ 1-3GalNAc $\alpha$ -sp3                               | 789.8  |
| 395                          | GlcNAc $\beta$ 1-3(GlcNAc $\beta$ 1-6)Gal $\beta$ 1-4GlcNAc $\beta$ -sp3                      | 832.8  |
| 401                          | Gal $\beta$ 1-3GlcNAc $\beta$ 1-3Gal $\beta$ 1-3GlcNAc $\beta$ -sp3                           | 805.8  |
| 419                          | 3-O-SuGal $\beta$ 1-4GlcNAc $\beta$ 1-3Gal $\beta$ 1-4GlcNAc $\beta$ -sp3                     | 907.8  |
| 420                          | 4-O-SuGal $\beta$ 1-4GlcNAc $\beta$ 1-3Gal $\beta$ 1-4GlcNAc $\beta$ -sp3                     | 907.8  |
| 421                          | Neu5Ac $\alpha$ 2-3(GalNAc $\beta$ 1-4)Gal $\beta$ 1-4Glc $\beta$ -sp2                        | 879.8  |
| 422                          | Neu5Ac $\alpha$ 2-3Gal $\beta$ 1-4GlcNAc $\beta$ 1-3Gal $\beta$ -sp3                          | 893.9  |
| 423                          | Fuca1-3(Neu5Ac $\alpha$ 2-3Gal $\beta$ 1-4)GlcNAc $\beta$ -sp3                                | 877.9  |
| 426                          | Neu5Ac $\alpha$ 2-3Gal $\beta$ 1-3(Fuca1-4)GlcNAc $\beta$ -sp3                                | 877.9  |
| 428                          | Fuca1-3(Neu5Ac $\alpha$ 2-3Gal $\beta$ 1-4)6-O-Su-GlcNAc $\beta$ -sp3                         | 979.9  |
| 429                          | Fuca1-3(Neu5Ac $\alpha$ 2-3(6-O-Su)Gal $\beta$ 1-4)GlcNAc $\beta$ -sp3                        | 979.9  |
| 433                          | Neu5Ac $\alpha$ 2-3Gal $\beta$ 1-3(Neu5Ac $\alpha$ 2-6)GalNAc $\alpha$ -sp3                   | 1044.9 |
| 434                          | Neu5Ac $\alpha$ 2-8Neu5Ac $\alpha$ 2-3Gal $\beta$ 1-4Glc $\beta$ -sp4                         | 1002.9 |
| <b>Penta-Nonasaccharides</b> |                                                                                               |        |
| 479                          | Fuca1-2Gal $\beta$ 1-3GlcNAc $\beta$ 1-3Gal $\beta$ 1-4Glc $\beta$ -sp4                       | 909.9  |
| 480                          | Fuca1-2Gal $\beta$ 1-3GlcNAc $\beta$ 1-3Gal $\beta$ 1-4GlcNAc $\beta$ -sp2                    | 937.9  |
| 481                          | Gal $\alpha$ 1-3Gal $\beta$ 1-4GlcNAc $\beta$ 1-3Gal $\beta$ 1-4Glc $\beta$ -sp4              | 925.8  |
| 483                          | Fuca1-3(Fuca1-2(Gal $\alpha$ 1-3)Gal $\beta$ 1-4)GlcNAc $\beta$ -sp3                          | 894.9  |
| 488                          | Gal $\beta$ 1-4GlcNAc $\beta$ 1-3(Gal $\beta$ 1-4GlcNAc $\beta$ 1-6)GalNAc $\alpha$ -sp3      | 1008.9 |
| 489                          | Gal $\beta$ 1-4GlcNAc $\beta$ 1-3(GlcNAc $\beta$ 1-6)Gal $\beta$ 1-4GlcNAc-sp2                | 994.9  |
| 490                          | GlcNAc $\beta$ 1-3(Gal $\beta$ 1-4GlcNAc $\beta$ 1-6)Gal $\beta$ 1-4GlcNAc $\beta$ -sp2       | 994.9  |
| 492                          | (Glc $\alpha$ 1-6) $_5\beta$ -sp4                                                             | 884.8  |
| 493                          | (GlcNAc $\beta$ 1-4) $_5\beta$ -sp4                                                           | 1090   |
| 495                          | Man $\alpha$ 1-3(Man $\alpha$ 1-3(Man $\alpha$ 1-6)Man $\alpha$ 1-6)Man $\beta$ -sp4          | 966.9  |
| 496                          | Fuca1-2Gal $\beta$ 1-3(Fuca1-4)GlcNAc $\beta$ 1-3Gal $\beta$ 1-4Glc $\beta$ -sp4              | 1056   |
| 497                          | Fuca1-3(Fuca1-2Gal $\beta$ 1-4)GlcNAc $\beta$ 1-3Gal $\beta$ 1-4Glc $\beta$ -sp4              | 1056.0 |
| 498                          | (Gal $\beta$ 1-4GlcNAc $\beta$ 1-3) $_3$ -sp3                                                 | 1171.1 |
| 499                          | Gal $\beta$ 1-4GlcNAc $\beta$ 1-3(Gal $\beta$ 1-4GlcNAc $\beta$ 1-6)Gal $\beta$ 1-4GlcNAc-sp2 | 1157.1 |
| 501                          | Gal $\beta$ 1-3GalNAc $\beta$ 1-3Gal $\alpha$ 1-4Gal $\beta$ 1-4Glc $\beta$ -sp4              | 925.8  |
| 502                          | (Glc $\alpha$ 1-6) $_6\beta$ -sp4                                                             | 1046.9 |
| 503                          | (GlcNAc $\beta$ 1-4) $_6\beta$ -sp4                                                           | 1293.3 |
| 504                          | (A-GN-M)2-3,6-M-GN-GN $\beta$ -sp4                                                            | 1697.6 |
| 505                          | (GN-M)2-3,6-M-GN-GN $\beta$ -sp4                                                              | 1373.3 |
| 527                          | Neu5Ac $\alpha$ 2-3Gal $\beta$ 1-4GlcNAc $\beta$ 1-3Gal $\beta$ 1-4GlcNAc $\beta$ -sp2        | 1083.0 |
| 528                          | Fuca1-3(Neu5Ac $\alpha$ 2-3Gal $\beta$ 1-4)GlcNAc $\beta$ 1-3Gal $\beta$ -sp3                 | 1040.0 |
| 529                          | Neu5Ac $\alpha$ 2-6(Gal $\beta$ 1-3)GlcNAc $\beta$ 1-3Gal $\beta$ 1-4Glc $\beta$ -sp4         | 1055.0 |
| 531                          | GalNAc $\beta$ 1-4(Neu5Ac $\alpha$ 2-8Neu5Ac $\alpha$ 2-3)Gal $\beta$ 1-4Glc-sp2              | 1193.1 |
| 532                          | Neu5Ac $\alpha$ 2-8Neu5Ac $\alpha$ 2-8Neu5Ac $\alpha$ 2-3Gal $\beta$ 1-4Glc-sp2               | 1303.1 |
| 533                          | (Neu5Ac $\alpha$ 2-8) $_2$ Neu5Ac $\alpha$ 2-3(GalNAc $\beta$ 1-4)Gal $\beta$ 1-4Glc-sp2      | 1506.3 |
| 534                          | Neu5Ac $\alpha$ 2-3Gal $\beta$ 1-4GlcNAc $\beta$ 1-3Gal $\beta$ 1-4GlcNAc $\beta$ -sp3        | 1097.1 |
| 536                          | Neu5Ac $\alpha$ 2-3Gal $\beta$ 1-3GlcNAc $\beta$ 1-3Gal $\beta$ 1-4Glc $\beta$ -sp4           | 1055.0 |
| 537                          | Neu5Ac $\alpha$ 2-3Gal $\beta$ 1-4GlcNAc $\beta$ 1-3Gal $\beta$ 1-4Glc $\beta$ -sp4           | 1055.0 |
| 538                          | Le $^x$ 1-6'(Le $^c$ 1-3')Lac-sp4                                                             | 1389.2 |
| 539                          | LacNAc1-6'(Led1-3')Lac-sp4                                                                    | 1389.2 |
| 540                          | Le $^x$ 1-6'(6'SLN1-3')Lac-sp4                                                                | 1566.5 |
| 541                          | Le $^x$ 1-6'(Le $^d$ 1-3')Lac-sp4                                                             | 1535.4 |
| 542                          | Le $^c$ Le $^x$ 1-6'(Le $^c$ 1-3')Lac-sp4                                                     | 1754.6 |

|                                    |                                                                     |        |
|------------------------------------|---------------------------------------------------------------------|--------|
| 543                                | Le <sup>x</sup> 1-6'(Le <sup>b</sup> 1-3')Lac-sp4                   | 1681.5 |
| <b>Higher Oligosaccharides</b>     |                                                                     |        |
| 625                                | (GlcAβ1-4GlcNAcβ1-3) <sub>8</sub> -NH <sub>2</sub> -ol              | 3207.5 |
| 627                                | (Sia2-6A-GN-M)2-3,6-M-GN-GNβ-sp4                                    | 2302.1 |
| <b>Terminal Galactose</b>          |                                                                     |        |
| 1A                                 | Galβ1-3GlcNAc                                                       | 383.35 |
| 1B                                 | Galβ1-4GlcNAc                                                       | 383.35 |
| 1C                                 | Galβ1-4Gal                                                          | 342.3  |
| 1D                                 | Galβ1-6GlcNAc                                                       | 383.3  |
| 1E                                 | Galβ1-3GalNAc                                                       | 383.3  |
| 1F                                 | Galβ1-3GalNAcβ1-4Galβ1-4Glc                                         | 707.6  |
| 1G                                 | Galβ1-3GlcNAcβ1-3Galβ1-4Glc                                         | 707.6  |
| 1H                                 | Galβ1-4GlcNAcβ1-3Galβ1-4Glc                                         | 707.6  |
| 1I                                 | Galβ1-4GlcNAcβ1-6(Galβ1-4GlcNAcβ1-3)Galβ1-4Glc                      | 1072.9 |
| 1J                                 | Galβ1-4GlcNAcβ1-6(Galβ1-3GlcNAcβ1-3)Galβ1-4Glc                      | 1072.9 |
| 1K                                 | Galα1-4Galβ1-4Glc                                                   | 504.4  |
| 1L                                 | GalNAcα1-O-Ser                                                      | 308.2  |
| 1M                                 | Galβ1-3GalNAcα1-O-Ser                                               | 470.4  |
| 1N                                 | Galα1-3Gal                                                          | 342.2  |
| 1O                                 | Galα1-3Galβ1-4GlcNAc                                                | 545.4  |
| 1P                                 | Galα1-3Galβ1-4Glc                                                   | 504.4  |
| 2A                                 | Galα1-3Galβ1-4Galα1-3Gal                                            | 666.5  |
| 2B                                 | Galβ1-6Gal                                                          | 342.3  |
| 2C                                 | GalNAcβ1-3Gal                                                       | 383.3  |
| 2D                                 | GalNAcβ1-4Gal                                                       | 383.3  |
| 2E                                 | Galα1-4Galβ1-4GlcNAc                                                | 545.4  |
| 2F                                 | GalNAcα1-3Galβ1-4Glc                                                | 545.4  |
| 2G                                 | Galβ1-3GlcNAc β1-3Galβ1-4GlcNAc β1-6(Galβ1- 3GlcNAc β1-3)Galβ1-4Glc | 1438.3 |
| 2H                                 | Galβ1-3GlcNAc β1-3Galβ1-4GlcNAc β1-3Galβ1-4Glc                      | 1072.9 |
| 18B                                | Galβ1-3GalNAcβ1-3Galα1-4Galβ1-4Glc                                  | 869.7  |
| 18C                                | Galβ1-3GalNAcβ1-3Gal                                                | 545.4  |
| 18L                                | Galβ1-4Glc                                                          | 342.3  |
| 18M                                | Galβ1-4Gal                                                          | 360.3  |
| 18N                                | Galβ1-6Gal                                                          | 342.3  |
| <b>Terminal GlcNAc</b>             |                                                                     |        |
| 4A                                 | GlcNAcβ1-4GlcNAc                                                    | 424.4  |
| 4B                                 | GlcNAcβ1-4GlcNAcβ1-4GlcNAc                                          | 627.5  |
| 4C                                 | GlcNAcβ1-4GlcNAcβ1-4GlcNAcβ1-4GlcNAc                                | 830.7  |
| 4D                                 | GlcNAcβ1-4GlcNAcβ1-4GlcNAcβ1-4GlcNAcβ1- 4GlcNAcβ1-4GlcNAc           | 1237.1 |
| 4E                                 | Bacterial cell wall muramyl disaccharide                            | 496.4  |
| 4F                                 | GlcNAcβ1-4GlcNAcβ1-4GlcNAcβ1-4GlcNAcβ1-4GlcNAc                      | 1033.9 |
| 18G                                | 6-O-Su-GlcNAc                                                       | 323.2  |
| 18H                                | GlcNAc                                                              | 221.2  |
| <b>Mannosyl-containing Glycans</b> |                                                                     |        |
| 5A                                 | GlcNAcβ1-2Man                                                       | 383.3  |
| 5B                                 | GlcNAcβ1-2Manα1-6(GlcNAcβ1-2Manα1-3)Man                             | 910.8  |
| 5C                                 | Manα1-2Man                                                          | 342.3  |

|                            |                                                                                                                                           |        |
|----------------------------|-------------------------------------------------------------------------------------------------------------------------------------------|--------|
| 5D                         | Man $\alpha$ 1-3Man                                                                                                                       | 342.3  |
| 5E                         | Man $\alpha$ 1-4Man                                                                                                                       | 342.3  |
| 5F                         | Man $\alpha$ 1-6Man                                                                                                                       | 342.3  |
| 5G                         | Man $\alpha$ 1-6(Man $\alpha$ 1-3)Man                                                                                                     | 504.4  |
| 5H                         | Man $\alpha$ 1-6(Man $\alpha$ 1-3)Man $\alpha$ 1-6(Man $\alpha$ 1-3)Man                                                                   | 828.7  |
| <b>Fucosylated Glycans</b> |                                                                                                                                           |        |
| 7A                         | Fuca1-2Gal $\beta$ 1-3GlcNAc $\beta$ 1-3Gal $\beta$ 1-4Glc                                                                                | 853.7  |
| 7B                         | Gal $\beta$ 1-3(Fuca1-4)GlcNAc $\beta$ 1-3Gal $\beta$ 1-4Glc                                                                              | 853.7  |
| 7C                         | Gal $\beta$ 1-4(Fuca1-3)GlcNAc $\beta$ 1-3Gal $\beta$ 1-4Glc                                                                              | 853.7  |
| 7D                         | Fuca1-2Gal $\beta$ 1-3(Fuca1-4)GlcNAc $\beta$ 1-3Gal $\beta$ 1-4Glc                                                                       | 999.9  |
| 7E                         | Gal $\beta$ 1-3(Fuca1-4)GlcNAc $\beta$ 1-3Gal $\beta$ 1-4(Fuca1-3)Glc                                                                     | 999.9  |
| 7F                         | Fuca1-2Gal                                                                                                                                | 326.3  |
| 7G                         | Fuca1-2Gal $\beta$ 1-4Glc                                                                                                                 | 488.4  |
| 7H                         | Gal $\beta$ 1-4(Fuca1-3)Glc                                                                                                               | 488.4  |
| 7I                         | Gal $\beta$ 1-4(Fuca1-3)GlcNAc                                                                                                            | 529.4  |
| 7J                         | Gal $\beta$ 1-3(Fuca1-4)GlcNAc                                                                                                            | 529.4  |
| 7K                         | GalNAc $\alpha$ 1-3(Fuca1-2)Gal                                                                                                           | 529.4  |
| 7L                         | Fuca1-2Gal $\beta$ 1-4(Fuca1-3)Glc                                                                                                        | 616.2  |
| 7M                         | Gal $\beta$ 1-3(Fuca1-2)Gal                                                                                                               | 488.4  |
| 7N                         | Fuca1-2Gal $\beta$ 1-4(Fuca1-3)GlcNAc                                                                                                     | 675.6  |
| 7O                         | Fuca1-2Gal $\beta$ 1-3GlcNAc                                                                                                              | 529.4  |
| 7P                         | Fuca1-2Gal $\beta$ 1-3(Fuca1-4)GlcNAc                                                                                                     | 675.6  |
| 8A                         | SO <sub>3</sub> -3Gal $\beta$ 1-3(Fuca1-4)GlcNAc                                                                                          | 631.5  |
| 8B                         | SO <sub>3</sub> -3Gal $\beta$ 1-4(Fuca1-3)GlcNAc                                                                                          | 631.5  |
| 8C                         | Gal $\beta$ 1-3GlcNAc $\beta$ 1-3Gal $\beta$ 1-4(Fuca1-3)GlcNAc $\beta$ 1-3Gal $\beta$ 1- 4Glc                                            | 1219.1 |
| 8D                         | Gal $\beta$ 1-4(Fuca1-3)GlcNAc $\beta$ 1-6(Gal $\beta$ 1-3GlcNAc $\beta$ 1-3)Gal $\beta$ 1- 4Glc                                          | 1219.1 |
| 8E                         | Gal $\beta$ 1-4(Fuca1-3)GlcNAc $\beta$ 1-6(Fuca1-2Gal $\beta$ 1-3GlcNAc $\beta$ 1- 3)Gal $\beta$ 1-4Glc                                   | 1365.2 |
| 8F                         | Gal $\beta$ 1-4(Fuca1-3)GlcNAc $\beta$ 1-6(Fuca1-2Gal $\beta$ 1-3(Fuca1- 4)GlcNAc $\beta$ 1- 3)Gal $\beta$ 1-4Glc                         | 1511.3 |
| 8G                         | Gal $\beta$ 1-4GlcNAc $\beta$ 1-3Gal $\beta$ 1-4(Fuca1-3)Glc                                                                              | 853.7  |
| 8H                         | Fuca1-2Gal $\beta$ 1-4(Fuca1-3)GlcNAc $\beta$ 1-3Gal $\beta$ 1-4Glc                                                                       | 999.9  |
| 8I                         | Fuca1-3Gal $\beta$ 1-4GlcNAc $\beta$ 1-3Gal $\beta$ 1-4(Fuca1-3)Glc                                                                       | 999.9  |
| 8J                         | Fuca1-2Gal $\beta$ 1-4(Fuca1-3)GlcNAc $\beta$ 1-3(Fuca1-2)Gal $\beta$ 1-4Glc                                                              | 1146.0 |
| 8K                         | Gal $\beta$ 1-4(Fuca1-3)GlcNAc $\beta$ 1-6(Gal $\beta$ 1-4GlcNAc $\beta$ 1-3)Gal $\beta$ 1-4                                              | 1219.1 |
| 8L                         | Gal $\beta$ 1-4(Fuca1-3)GlcNAc $\beta$ 1-6(Gal $\beta$ 1-4(Fuca1-3)GlcNAc $\beta$ 1- 3)Gal $\beta$ 1-4Glc                                 | 1365.2 |
| 8M                         | Fuca1-2Gal $\beta$ 1-4(Fuca1-3)GlcNAc $\beta$ 1-6(Gal $\beta$ 1-4GlcNAc $\beta$ 1- 3)Gal $\beta$ 1-4Glc                                   | 1365.2 |
| 8N                         | Gal $\beta$ 1-3GlcNAc $\beta$ 1-3Gal $\beta$ 1-4(Fuca1-3)GlcNAc $\beta$ 1-6(Gal $\beta$ 1- 3GlcNAc $\beta$ 1- 3)Gal $\beta$ 1-4Glc        | 1584.4 |
| 8O                         | Fuca1-2Gal $\beta$ 1-3GlcNAc $\beta$ 1-3Gal $\beta$ 1-4(Fuca1-3)GlcNAc $\beta$ 1- 6(Gal $\beta$ 1- 3GlcNAc $\beta$ 1-3)Gal $\beta$ 1-4Glc | 1876.7 |
| 8P                         | GalNAc $\alpha$ 1-3(Fuca1-2)Gal $\beta$ 1-4GalNAc                                                                                         | 732.6  |
| 9A                         | Gal $\alpha$ 1-3(Fuca1-2)Gal $\beta$ 1-4(Fuca1-3)Glc                                                                                      | 796.7  |
| 9B                         | Gal $\beta$ 1-4GlcNAc $\beta$ 1-6(Fuca1-2Gal $\beta$ 1-3GlcNAc $\beta$ 1-3)Gal $\beta$ 1- 4Glc                                            | 1219.1 |
| 18D                        | Gal $\alpha$ 1-3(Fuca1-2)Gal $\beta$ 1-4Glc                                                                                               | 650.5  |
| 18E                        | GalNAc $\alpha$ 1-3(Fuca1-2)Gal $\beta$ 1-4(Fuca1-3)Glc                                                                                   | 837.7  |
| 19J                        | Gal $\beta$ 1-4(Fuca1-3)GlcNAc $\beta$ 1-3Gal                                                                                             | 691.6  |
| 19L                        | Fuca1-2Gal $\beta$ 1-4(Fuca1-3)GlcNAc $\beta$ 1-3Gal                                                                                      | 837.7  |
| 19M                        | Gal $\beta$ 1-3(Fuca1-4)GlcNAc $\beta$ 1-3Gal                                                                                             | 691.6  |

|                                            |                                                                      |        |
|--------------------------------------------|----------------------------------------------------------------------|--------|
| 19N                                        | Fuca1-2Galβ1-3(Fuca1-4)GlcNAcβ1-3Gal                                 | 837.7  |
| <b>Sialylated Glycans</b>                  |                                                                      |        |
| 10A                                        | Neu5Acα2-3Galβ1-3(Fuca1-4)GlcNAc                                     | 820.7  |
| 10B                                        | Neu5Acα2-3Galβ1-4(Fuca1-3)GlcNAc                                     | 820.7  |
| 10C                                        | Neu5Acα2-3Galβ1-3GlcNAcβ1-3Galβ1-4Glc                                | 818.2  |
| 10D                                        | Galβ1-4(Fuca1-3)GlcNAc β1-6(Neu5Acα2-6Galβ1- 4GlcNAc β1-3)Galβ1-4Glc | 1510.3 |
| 10E                                        | Neu5Acα2-3Galβ1-3(Neu5Acα2-6)GalNAc                                  | 965.8  |
| 10H                                        | Neu5Acα2-6Galβ1-3GlcNAcβ1-3Galβ1-4(Fuca1-3)Glc                       | 1145.0 |
| 10I                                        | Galβ1-3GlcNAcβ1-3(Neu5Acα2-6Galβ1-4GlcNAcβ1- 6)Galβ1-4Glc            | 1364.2 |
| 10J                                        | Neu5Acα2-6Galβ1-3GlcNAcβ1-3(Galβ1-4GlcNAcβ1- 6)Galβ1-4Glc            | 1364.2 |
| 10K                                        | Neu5Acα2-3Galβ1-4GlcNAc                                              | 674.6  |
| 10L                                        | Neu5Acα2-6Galβ1-4GlcNAc                                              | 674.6  |
| 10M                                        | Neu5Acα2-3Galβ1-3GlcNAcβ1-3Galβ1-4Glc                                | 998.8  |
| 10N                                        | Galβ1-3(Neu5Acα2-6)GlcNAc β1-3Galβ1-4Glc                             | 998.8  |
| 10O                                        | Neu5Acα2-6Galβ1-4GlcNAc β1-3Galβ1-4Glc                               | 998.8  |
| 10P                                        | Neu5Acα2-3Galβ1-3(Neu5Acα2-6)GlcNAc β1-3Galβ1-4Glc                   | 1290.1 |
| 11A                                        | Neu5Acα2-3Galβ1-4Glc                                                 | 633.5  |
| 11B                                        | Neu5Acα2-6Galβ1-4Glc                                                 | 633.5  |
| 11C                                        | (Neu5Acα2-8Neu5Ac) <sub>n</sub> ( <i>n</i> <50)                      |        |
| 18A                                        | Neu5Acα2-3Galβ1-4GlcNAcβ1-3Galβ1-4Glc                                | 1020.8 |
| 18K                                        | 9-NAc-Neu5Ac                                                         | 351.3  |
| 18O                                        | Neu5Gc                                                               | 325.2  |
| 19K                                        | Neu5Acα2-3Galβ1-4(Fuca1-3)GlcNAcβ1-3Gal                              | 1004.8 |
| <b>Carageenan &amp; Glycosaminoglycans</b> |                                                                      |        |
| 12A                                        | Neocarratetraose-41, 3-di-O-sulphate                                 | 834.6  |
| 12B                                        | Neocarratetraose-41-O-sulphate                                       | 732.5  |
| 12C                                        | Neocarrahexaose-24,41, 3, 5-tetra-O-sulphate                         | 1344.9 |
| 12D                                        | Neocarrahexaose-41, 3, 5-tri-O-sulphate                              | 1242.9 |
| 12E                                        | Neocarraoctaose-41, 3, 5, 7-tetra-O-sulphate                         | 1651.2 |
| 12F                                        | Neocarradecaose-41, 3, 5, 7, 9-penta-O-sulphate                      | 2059.5 |
| 12G                                        | ΔUA-2S-GlcNS-6S                                                      | 665.4  |
| 12H                                        | ΔUA-GlcNS-6S                                                         | 563.3  |
| 12I                                        | ΔUA-2S-GlcNS                                                         | 563.3  |
| 12J                                        | ΔUA-2S-GlcNAc-6S                                                     | 605.3  |
| 12K                                        | ΔUA-GlcNAc-6S                                                        | 503.3  |
| 12L                                        | ΔUA-2S-GlcNAc                                                        | 503.3  |
| 12M                                        | ΔUA-GlcNAc                                                           | 401.3  |
| 12N                                        | ΔUA-GalNAc-4S (Delta Di-4S)                                          | 503.3  |
| 12O                                        | ΔUA-GalNAc-6S (Delta Di-6S)                                          | 503.3  |
| 12P                                        | ΔUA-GalNAc-4S,6S (Delta Di-disE)                                     | 605.3  |
| 13A                                        | ΔUA-2S-GalNAc-4S (Delta Di-disB)                                     | 605.3  |
| 13B                                        | ΔUA-2S-GalNAc-6S (Delta Di-disD)                                     | 605.3  |
| 13C                                        | ΔUA-2S-GalNAc-4S-6S (Delta Di-tisS)                                  | 707.4  |
| 13D                                        | ΔUA-2S-GalNAc-6S (Delta Di-UA2S)                                     | 503.3  |
| 13E                                        | ΔUA-GlcNAc (Delta Di-HA)                                             | 401.3  |
| 13F                                        | (GlcAβ1-3GlcNAc β1-4) <sub>n</sub> ( <i>n</i> =4)                    |        |
| 13G                                        | (GlcAβ1-3GlcNAc β1-4) <sub>n</sub> ( <i>n</i> =8)                    |        |
| 13H                                        | (GlcAβ1-3GlcNAc β1-4) <sub>n</sub> ( <i>n</i> =10)                   |        |



|                                    |                                                                                                                                                                |        |
|------------------------------------|----------------------------------------------------------------------------------------------------------------------------------------------------------------|--------|
| 13I                                | (GlcA $\beta$ 1-3GlcNAc $\beta$ 1-4) <sub>n</sub> ( <i>n</i> =12)                                                                                              |        |
| 13J                                | (GlcA/IdoA $\alpha$ / $\beta$ 1-4GlcNAc $\alpha$ 1-4) <sub>n</sub> ( <i>n</i> =200)                                                                            |        |
| 13K                                | (GlcA/IdoA $\beta$ 1-3( $\pm$ 4/6S)GalNAc $\beta$ 1-4) <sub>n</sub> ( <i>n</i> <250)                                                                           |        |
| 13L                                | (( $\pm$ 2S)GlcA/IdoA $\alpha$ /b1-3( $\pm$ 4S)GalNAc $\beta$ 1-4) <sub>n</sub> ( <i>n</i> <250)                                                               |        |
| 13M                                | (GlcA/IdoA $\beta$ 1-3( $\pm$ 6S)GalNAc $\beta$ 1-4) <sub>n</sub> ( <i>n</i> <250)                                                                             |        |
| 13N                                | HA - 4                                                                                                                                                         | 775    |
| 13O                                | HA - 6                                                                                                                                                         | 1155.6 |
| 13P                                | HA - 8                                                                                                                                                         | 1534.7 |
| 14A                                | HA 10                                                                                                                                                          | 1913.8 |
| 14B                                | HA-12                                                                                                                                                          | 2293.4 |
| 14C                                | HA-14                                                                                                                                                          | 2672.5 |
| 14D                                | HA-16                                                                                                                                                          |        |
| 14E                                | HA 30000 Da                                                                                                                                                    |        |
| 14F                                | HA 107000 Da                                                                                                                                                   |        |
| 14G                                | HA 190000 Da                                                                                                                                                   |        |
| 14H                                | HA 220000 Da                                                                                                                                                   |        |
| 14I                                | HA 1600000 Da                                                                                                                                                  |        |
| 14J                                | Heparin sulfate                                                                                                                                                |        |
| 14K                                | $\beta$ 1-3Glucan                                                                                                                                              |        |
| 14L                                | Chondroitin disaccharide $\Delta$ di-OS, sodium salt                                                                                                           | 401.3  |
| 14M                                | $\Delta$ UA $\rightarrow$ 2S-GlcN-6S                                                                                                                           | 541.3  |
| 14N                                | $\Delta$ UA $\rightarrow$ GlcN-6S                                                                                                                              | 439.3  |
| 14O                                | $\Delta$ UA $\rightarrow$ 2S-GlcN                                                                                                                              | 439.3  |
| 14P                                | $\Delta$ UA $\rightarrow$ GlcN                                                                                                                                 | 337.2  |
| 18I                                | GlcA                                                                                                                                                           | 194.1  |
| <b>Terminal Glucose Structures</b> |                                                                                                                                                                |        |
| 18J                                | 6-O-(H <sub>2</sub> PO <sub>4</sub> )-Glc                                                                                                                      | 260.1  |
| 19O                                | Glc $\alpha$ 1-4Glc $\alpha$ 1-4Glc                                                                                                                            | 504.4  |
| 19P                                | Glc $\alpha$ 1-4Glc $\alpha$ 1-4Glc $\alpha$ 1-4Glc                                                                                                            | 666.5  |
| <b>Ganglioside Structures</b>      |                                                                                                                                                                |        |
| 17A                                | GalNAc $\beta$ 1-4Gal $\beta$ 1-4Glc                                                                                                                           | 545.4  |
| 17B                                | Gal $\beta$ 1-3GalNAc $\beta$ 1-4Gal $\beta$ 1-4Glc                                                                                                            | 707.6  |
| 17C                                | Gal $\beta$ 1-3GalNAc $\beta$ 1-4(Neu5Ac $\alpha$ 2-8Neu5Ac $\alpha$ 2-8 Neu5Ac $\alpha$ 2- 3)Gal $\beta$ 1-4Glc                                               | 1647.3 |
| 17D                                | Neu5Ac $\alpha$ 2-8Neu5Ac $\alpha$ 2-3Gal $\beta$ 1-3GalNAc $\beta$ 1-4(Neu5Ac $\alpha$ 2- 3)Gal $\beta$ 1-4Glc                                                | 1647.3 |
| 17E                                | Gal $\beta$ 1-3GalNAc $\beta$ 1-4(Neu5Ac $\alpha$ 2-8Neu5Ac $\alpha$ 2-3)Gal $\beta$ 1-4Glc                                                                    | 1334.0 |
| 17F                                | Neu5Ac $\alpha$ 2-3Gal $\beta$ 1-3GalNAc $\beta$ 1-4(Neu5Ac $\alpha$ 2-3)Gal $\beta$ 1-4Glc                                                                    | 1334.0 |
| 17G                                | Neu5Ac $\alpha$ 2-3Gal $\beta$ 1-3GalNAc $\beta$ 1-4Gal $\beta$ 1-4Glc                                                                                         | 1020.8 |
| 17H                                | Gal $\beta$ 1-3GalNAc $\beta$ 1-4(Neu5Ac $\alpha$ 2-3)Gal $\beta$ 1-4Glc                                                                                       | 1020.8 |
| 17I                                | Fuc $\alpha$ 1-2Gal $\beta$ 1-3GalNAc $\beta$ 1-4(Neu5Ac $\alpha$ 2-3)Gal $\beta$ 1-4Glc                                                                       | 1168.0 |
| 17J                                | GalNAc $\beta$ 1-4(Neu5Ac $\alpha$ 2-8Neu5Ac $\alpha$ 2-8Neu5Ac $\alpha$ 2-3)Gal $\beta$ 1- 4Glc                                                               | 1485.1 |
| 17K                                | GalNAc $\beta$ 1-4(Neu5Ac $\alpha$ 2-8Neu5Ac $\alpha$ 2-3)Gal $\beta$ 1-4Glc                                                                                   | 1171.9 |
| 17L                                | GalNAc $\beta$ 1-4(Neu5Ac $\alpha$ 2-3)Gal $\beta$ 1-4Glc                                                                                                      | 858.7  |
| 17M                                | Neu5Ac $\alpha$ 2-8Neu5Ac $\beta$ 2-8Neu5Ac $\alpha$ 2-3Gal $\beta$ 1-4Glc                                                                                     | 1282.0 |
| 17N                                | Neu5Ac $\alpha$ 2-8Neu5Ac $\alpha$ 2-3Gal $\beta$ 1-4Glc                                                                                                       | 968.7  |
| 17O                                | Neu5Ac $\alpha$ 2-3Gal $\beta$ 1-4Glc                                                                                                                          | 655.5  |
| <b>Complex Type N-Glycans</b>      |                                                                                                                                                                |        |
| 19A                                | Gal $\beta$ 1-4GlcNAc $\beta$ 1-2Man $\alpha$ 1-3(Gal $\beta$ 1-4GlcNAc $\beta$ 1-2Man $\alpha$ 1- 6Man) $\beta$ 1-4GlcNAc $\beta$ 1-4(Fuc $\alpha$ 1-6)GlcNAc | 1787.0 |

|     |                                                                                                                              |        |
|-----|------------------------------------------------------------------------------------------------------------------------------|--------|
| 19B | Galβ1-4GlcNAcβ1-2(Galβ1-4GlcNAcβ1-4)Manα1-3(Galβ1- 4GlcNAcβ1-2(Galβ1-4GlcNAcβ1-6)Manα1-6Man)β1- 4GlcNAcβ1-4GlcNAc            | 2372.0 |
| 19C | Neu5Acα2-6Galβ1-4GlcNAcβ1-2Manα1-3(Galβ1- 4GlcNAcβ1-2Manα1-6)Manβ1-4GlcNAcβ1-4GlcNAc                                         | 1932.0 |
| 19D | Neu5Acα2-6Galβ1-4GlcNAcβ1-2Manα1-3(Neu5Acα2- 6Galβ1-4GlcNAcβ1-2Manα1-6)Manβ1-4GlcNAcβ1- 4GlcNAc                              | 2224.0 |
| 19E | Galβ1-4GlcNAcβ1-2Manα1-3(Galβ1-4GlcNAcβ1-2Manα1- 6)Manβ1-4GlcNAcβ1-4GlcNAc                                                   | 1641.0 |
| 19F | Neu5Acα2-6Galβ1-4GlcNAcβ1-2Manα1-3(Neu5Acα2- 6Galβ1-4GlcNAcβ1-2Manα1-6)Manβ1-4GlcNAcβ1- 4(Fuca1-6)GlcNAc                     | 2370.0 |
| 19G | Neu5Acα2-6Galβ1-4GlcNAcβ1-2(Neu5Acα2-6Galβ1- 4GlcNAcβ1-4)Manα1-3(Neu5Acα2-6Galβ1-4GlcNAcβ1- 2Manα1-6)Manβ1-4GlcNAcβ1-4GlcNAc | 2880.5 |
| 19H | GlcNAcβ1-2(GlcNAcβ1-4)Manα1-3(GlcNAcβ1-2Manα1- 6)GlcNAcβ1-4Manβ1-4GlcNAcβ1-4GlcNAc                                           | 1723.5 |
